# Supplementary material
Source: PubMed Central journal article supplement (PMC5204312)
Supplement: DB160394SupplementaryData.pdf [file DB160394SupplementaryData.pdf]

SUPPLEMENTARY DATA

**Supplementary Figure 1.** Acute islet hormone responses to bolus administration of arginine (5 g) under fasting, ~230 mg/dL, and ~340 mg/dL hyperglycemic clamp conditions for individual subjects by study group, pancreatic sufficient cystic fibrosis (PS-CF), pancreatic insufficient cystic fibrosis (PI-CF), and healthy control subjects. CFTR mutations are classified based on F508del status; F508del homozygous (grey triangle), F508del heterozygous (black triangle), other CFTR mutations (open grey circle), and other CFTR mutations on CFTR modulator, ivacaftor (black circles, diagonal pattern).

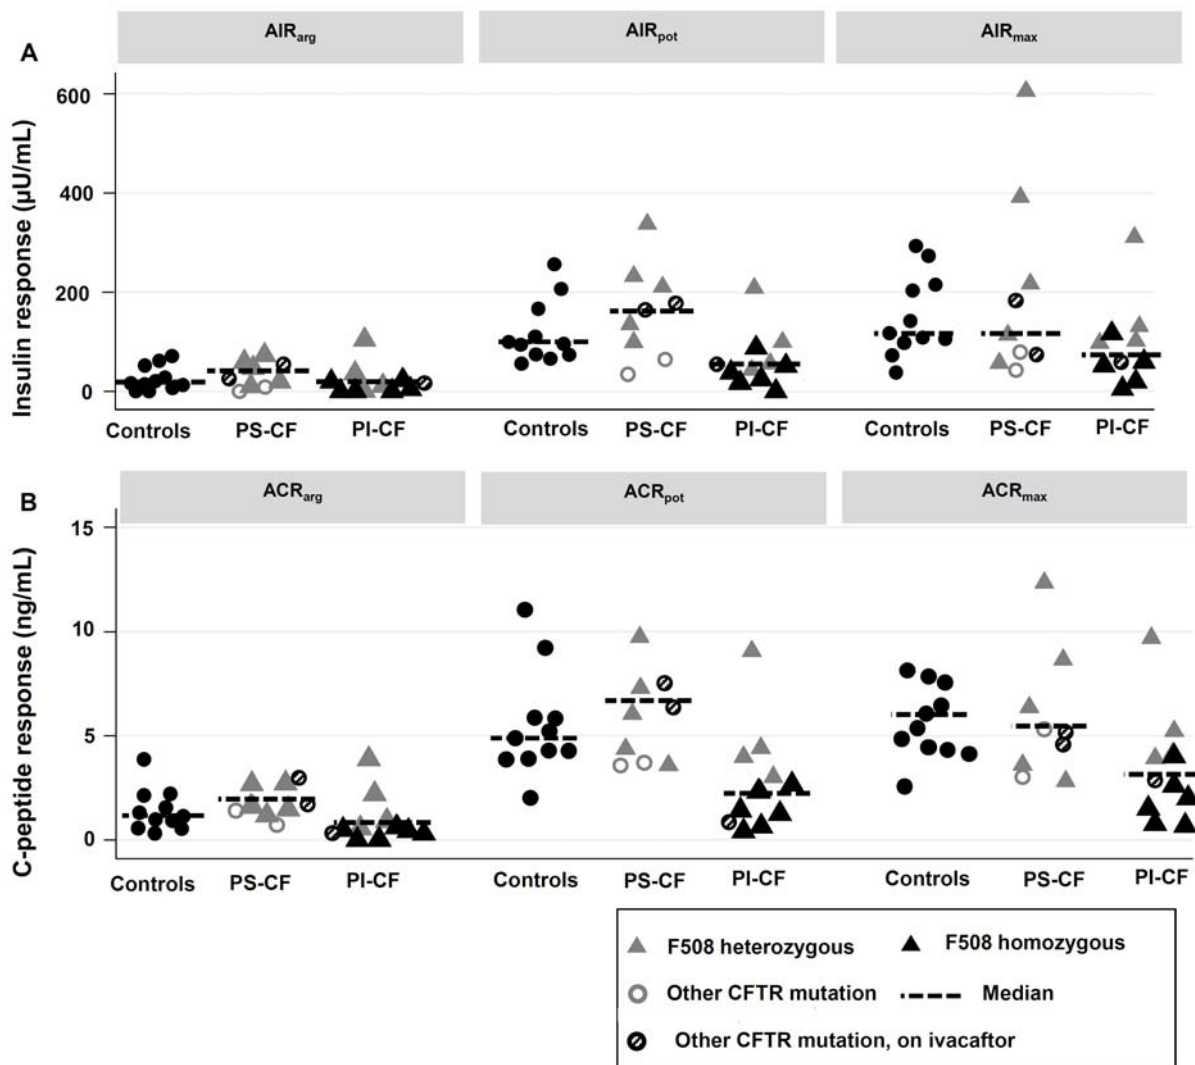

SUPPLEMENTARY DATA

**Supplementary Table 1. Cystic fibrosis transmembrane (CFTR) mutations in study subjects**

| PS-CF   |          |               | PI-CF   |          |          |
|---------|----------|---------------|---------|----------|----------|
| Subject | Allele 1 | Allele 2      | Subject | Allele 1 | Allele 2 |
| 1       | F508del  | L206W         | 1       | F508del  | F508del  |
| 2*      | G551D    | unknown       | 2       | F508del  | F508del  |
| 3       | R709X    | P102IT        | 3*      | G551D    | unknown  |
| 4       | F508del  | D1152H        | 4       | F508del  | F508del  |
| 5       | W1282X   | 3849+10kbC->T | 5       | F508del  | R560T    |
| 6       | F508del  | 3849+10kbC->T | 6       | F508del  | F508del  |
| 7*      | R117H    | W1282X        | 7       | F508del  | G542X    |
| 8       | F508del  | S549N         | 8       | F508del  | F508del  |
| 9       | F508del  | unknown       | 9       | F508del  | 5T       |
|         |          |               | 10      | F508del  | G85E     |
|         |          |               | 11      | F508del  | F508del  |

PS-CF, pancreatic sufficient cystic fibrosis; PI-CF, pancreatic insufficient cystic fibrosis

\*Denotes subjects on CFTR modulator, ivacaftor
